# Supplementary material for: Focus on Self-Presentation on Social Media across Sociodemographic Variables, Lifestyles, and Personalities: A Cross-Sectional Study
Source: MDPI journal article supplement (doi:10.3390/ijerph191711133), 2022-09-05
Supplement: s1 [file s1]

### Supplementary material

**Table S1.** The correlation matrix (non-parametric) of candidate self-presentation items

| Item | 1        | 2         | 3         | 4         | 5        | 6         | 7        | 8         | 9     |
|------|----------|-----------|-----------|-----------|----------|-----------|----------|-----------|-------|
| 1    | 1.000    |           |           |           |          |           |          |           |       |
| 2    | 0.665 ** | 1.000     |           |           |          |           |          |           |       |
| 3    | 0.619 ** | 0.869 **  | 1.000     |           |          |           |          |           |       |
| 4    | 0.444 ** | 0.598 **  | 0.599 **  | 1.000     |          |           |          |           |       |
| 5    | 0.360 ** | 0.385 **  | 0.381 **  | 0.397 **  | 1.000    |           |          |           |       |
| 6    | 0.199 ** | 0.170 **  | 0.182 **  | 0.237 **  | 0.219 ** | 1.000     |          |           |       |
| 7    | 0.406 ** | 0.479 **  | 0.477 **  | 0.402 **  | 0.288 ** | 0.179 **  | 1.000    |           |       |
| 8    | 0.510 ** | 0.600 **  | 0.584 **  | 0.478 **  | 0.339 ** | 0.204 **  | 0.631 ** | 1.000     |       |
| 9    | -0.83 ** | -0.139 ** | -0.140 ** | -0.099 ** | -0.022   | -0.060 ** | -0.019   | -0.074 ** | 1.000 |

Note. Item 1: «I use a lot of time and energy on the content I post on social media»; item 2: «It is important to me that my posts receive many likes and/or comments»; item 3: «It is important to me to have many followers on social media»; item 4: «I delete posts on social media that do not receive enough likes and/or comments»; item 5: «I retouch pictures of myself to look better before I post them on social media»; item 6: «It's easier to be myself on social media»; item 7: «What others post on social media (images/status updates/stories) makes me feel less content with myself and my life»; item 8: «The response I get for what I post (images/status updates/stories) impacts how I feel»; item 9: «I don't care about how many likes or comments I receive on social media»

\*\*Correlation is significant at the 0.01 level (2-tailed)
